# Supplementary material for: Sustainable Electropolymerization of Zingerone and Its C2 Symmetric Dimer for Amperometric Biosensor Films
Source: MDPI journal article supplement (doi:10.3390/molecules28166017), 2023-08-11
Supplement: s1 [file s1]

# Sustainable Electropolymerization of Zingerone and Its C2 Symmetric Dimer for Amperometric Biosensor Films

Myriam Caval<sup>1</sup>, Maria Antonietta Dettori<sup>2</sup>, Davide Fabbri<sup>2\*</sup>, Roberto Dallochio<sup>2</sup>, Alessandro Dessì<sup>2</sup>, Salvatore Marceddu<sup>3</sup>, Pier Andrea Serra<sup>4</sup>, Gaia Rocchitta<sup>4\*</sup>, Paola Carta<sup>2</sup>

<sup>1</sup> Dipartimento di Scienze Biomediche, Università Degli Studi di Sassari, Sassari 07100, Italy

<sup>2</sup> Istituto di Chimica Biomolecolare, Consiglio Nazionale Ricerche, Sassari 07100, Italy

<sup>3</sup> Istituto di Istituto Scienze delle Produzioni Alimentari, Consiglio Nazionale Ricerche, Sassari 07100, Italy

<sup>4</sup> Dipartimento di Medicina, Chirurgia e Farmacia, Università Degli Studi di Sassari, Sassari 07100, Italy

\* Correspondence: [grocchitta@uniss.it](mailto:grocchitta@uniss.it) (GR); [Davidegaetano.fabbri@cnr.it](mailto:Davidegaetano.fabbri@cnr.it) (DF)

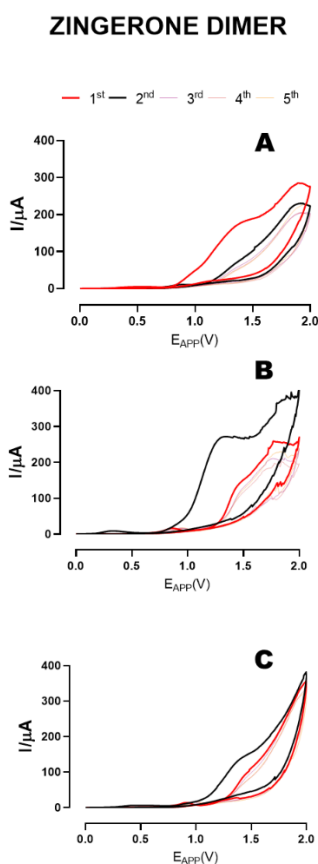

Figure S1: Cyclic voltammetries of ZING carried out in different conditions: in N<sub>2</sub>- (Panel A), air- (Panel B) and O<sub>2</sub>- saturated (Panel C) monomer solution.  $\Delta E = 0 \div 2.0$  V, scan rate: 100 mVs<sup>-1</sup>. 1 to 5 cycles are reported.

## ZINGERONE DIMER

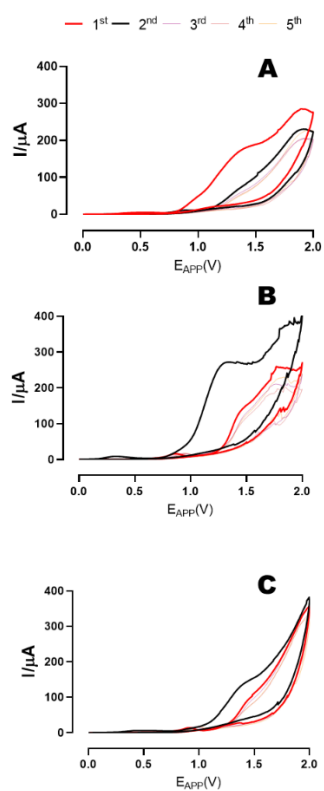

Figure S2: Cyclic voltammetries of ZING DIM carried out in different conditions: in  $\text{N}_2$ - (Panel A), air- (Panel B) and  $\text{O}_2$ - saturated (Panel C) monomer solution.  $\Delta E = 0 \div 2.0$  V, scan rate:  $100 \text{ mVs}^{-1}$ . 1 to 5 cycles are reported.

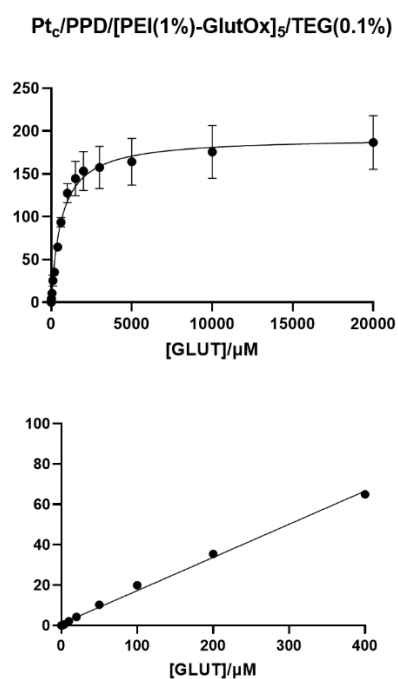

Figure S3: Michaelis-Menten kinetics plot (Panel A) ranging from 0 to 50 mM and linear regression curve (Panel B) ranging between 0-400  $\mu$ M of PPD-based glutamate biosensor design at Day 1. Pt<sub>c</sub>: Pt cylinder 1 mm long, 125  $\mu$ m diameter; PPD: polyortho-phenylenediamine; PEI: polyethyleneimine; GlutOx: Glutamate Oxidase; TEG: triethyleneglycol. The subscript number indicates the number of dipping steps and in brackets, the concentration of the component.

Pt<sub>c</sub>/polyZING/[PEI(1%)-GlutOx]<sub>5</sub>/TEG(0.1%)

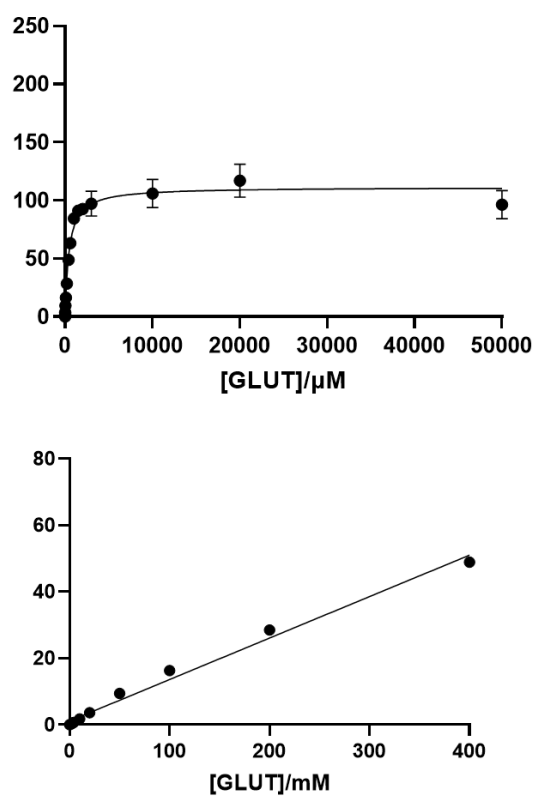

Figure S4: Michaelis-Menten kinetics plot (Panel A) ranging from 0 to 50 mM and linear regression curve (Panel B) ranging between 0-400  $\mu\text{M}$  of polyZING-based glutamate biosensor design at Day 1. Pt<sub>c</sub>: Pt cylinder 1 mm long, 125  $\mu\text{m}$  diameter; polyZING: polymer from ZING; PEI: polyethyleneimine; GlutOx: Glutamate Oxidase; TEG: triethyleneglycol. The subscript number indicates the number of dipping steps and in brackets, the concentration of the component.

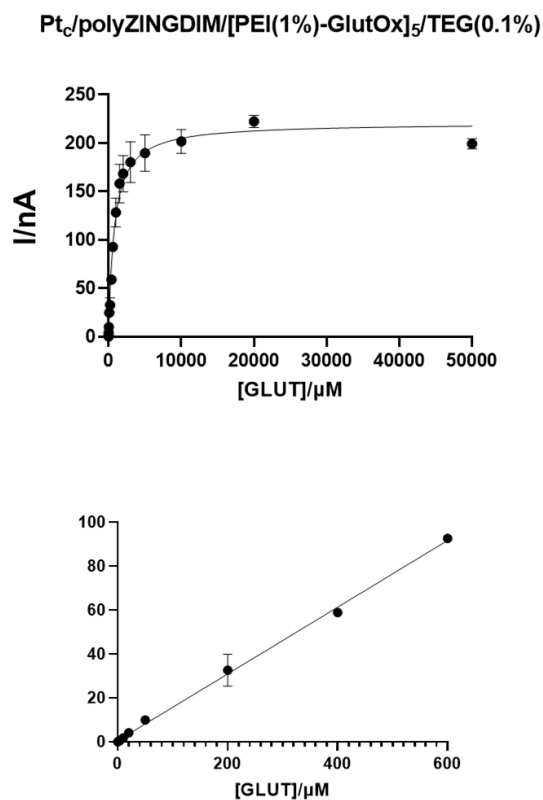

Figure S5: Michaelis-Menten kinetics plot (Panel A) ranging from 0 to 50 mM and linear regression curve (Panel B) ranging between 0-600  $\mu\text{M}$  of PPD-based glutamate biosensor design at Day 1. Pt<sub>c</sub>: Pt cylinder 1 mm long, 125  $\mu\text{m}$  diameter; polyZINGDIM: polymer from ZING DIM; PEI: polyethyleneimine; GlutOx: Glutamate Oxidase; TEG: triethyleneglycol. The subscript number indicates the number of dipping steps and, in brackets, the concentration of the component.

Table S1: In vitro parameters of three different glutamate biosensor designs (n=4) at Day 1 in terms of Michaelis–Menten kinetic parameters ( $V_{MAX}$  and  $K_M$ ) and analytical parameters (Linear Region Slope –LRS, LOD and LOQ) for each design. PPD-based: Pt<sub>c</sub>/PPD/PEI(1%)<sub>2</sub>/GluOx<sub>5</sub>/TEG(0.1%); polyZING-based: Pt<sub>c</sub>/polyZING/PEI(1%)<sub>2</sub>/GluOx<sub>5</sub>/TEG(0.1%); polyZINGDIM-based: Pt<sub>c</sub>/polyZINGDIM/PEI(1%)<sub>2</sub>/GluOx<sub>5</sub>/TEG(0.1%). Pt<sub>c</sub>: Pt cylinder 1 mm long, 125  $\mu$ m diameter; GluOx: L-glutamate oxidase; PPD:poly-ortho-phenylenediamine; polyZING: polymer from ZING; polyZINGDIM: polymer from ZING DIM; PEI: polyethyleneimine; TEG: triethyleneglycol. The subscript number indicates the number of dipping steps and in brackets, the concentration of the component. \*  $p < 0.05$  vs PPD; \*\*\*  $p < 0.01$  vs PPD; \*\*\*\*  $p < 0.001$  vs PPD.

| Biosensor Design  | $V_{MAX}$ (nA)     | $K_M$ ( $\mu$ M)  | LRS (nA/ $\mu$ M)     | LOD ( $\mu$ M)    | LOQ ( $\mu$ M)        | 1 mM AA (nA)          |
|-------------------|--------------------|-------------------|-----------------------|-------------------|-----------------------|-----------------------|
| PPD-based         | 192.6 $\pm$ 9.4    | 636.0 $\pm$ 81.3  | 0.164 $\pm$ 0.002     | 0.237 $\pm$ 0.001 | 0.791 $\pm$ 0.002     | 0.398 $\pm$ 0.163     |
| polyZING-based    | 111.4 $\pm$ 5.1*** | 451.5 $\pm$ 41.2* | 0.125 $\pm$ 0.003**** | 0.686 $\pm$ 0.004 | 2.285 $\pm$ 0.012**** | 5.307 $\pm$ 0.054**** |
| polyZINGDIM-based | 220.7 $\pm$ 9.0    | 783.7 $\pm$ 90.9  | 0.152 $\pm$ 0.004     | 0.701 $\pm$ 0.003 | 2.337 $\pm$ 0.009**** | 6.750 $\pm$ 0.687**** |
